# Supplementary material for: A diversity profile of the human skin microbiota
Source: HighWire-hosted journal article supplement (doi:10.1101/gr.075549.107), 2008-05-23
Supplement: Grice_FigureS1.pdf [file Grice_FigureS1.pdf]

A.

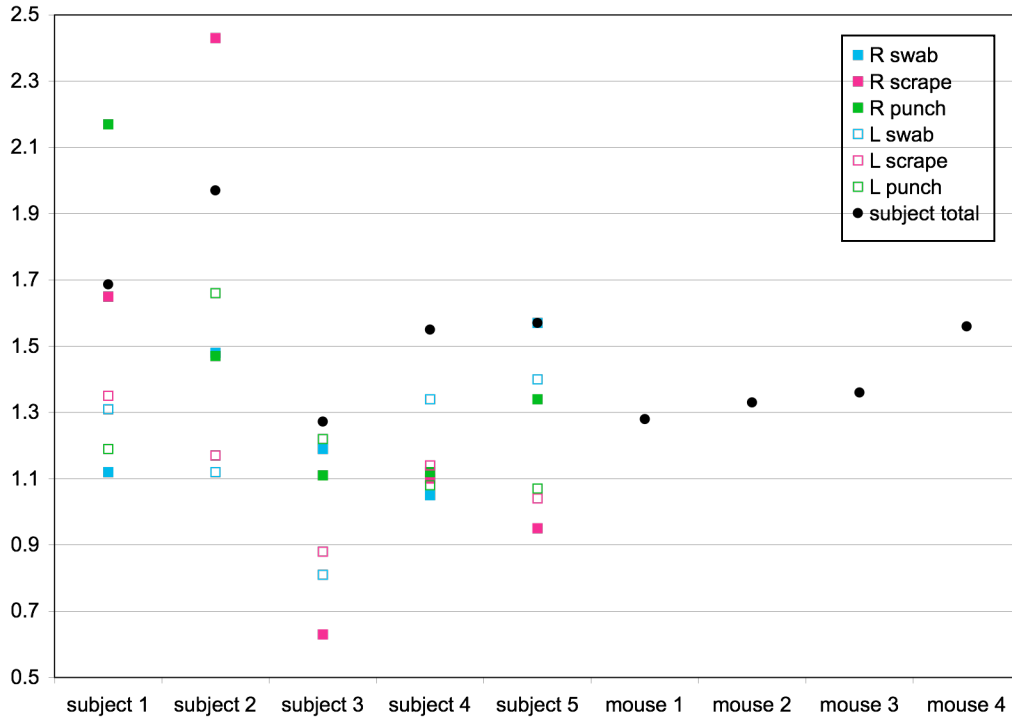

B.

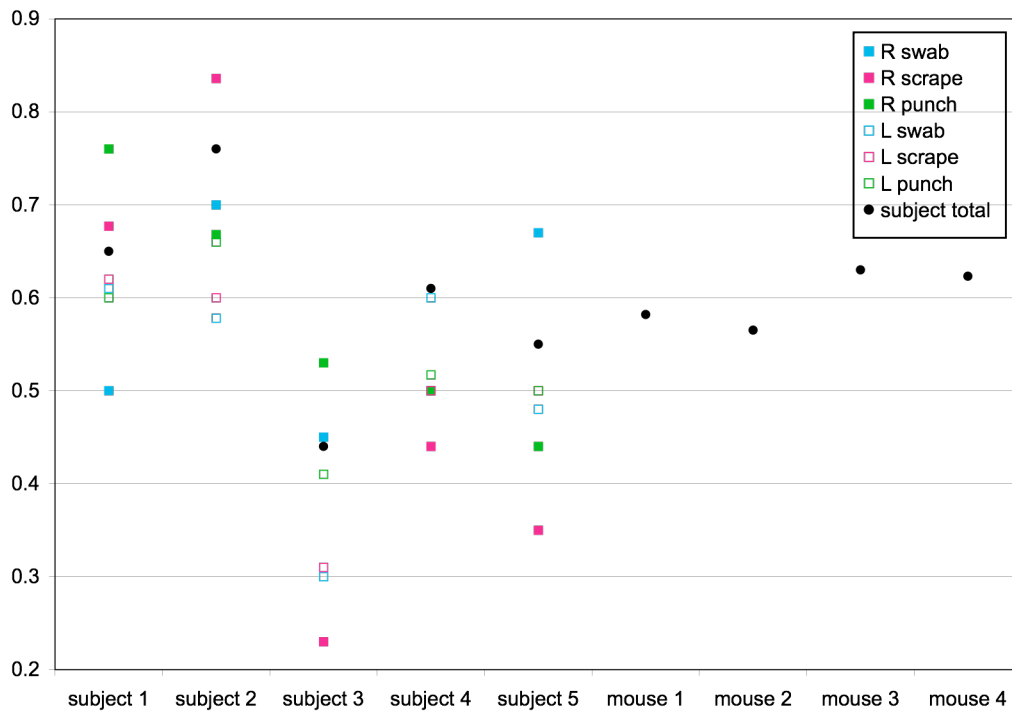

**Figure S1.** Calculated diversity indices per human or mouse subject and sorted by sampling method. Higher indices indicate higher diversity. Both Shannon (A) and Simpson (B) indices were calculated assuming an OTU cutoff of  $\geq 97\%$  similarity.
