# Supplementary material for: A diversity profile of the human skin microbiota
Source: HighWire-hosted journal article supplement (doi:10.1101/gr.075549.107), 2008-05-23
Supplement: Grice_FigureS3.pdf [file Grice_FigureS3.pdf]

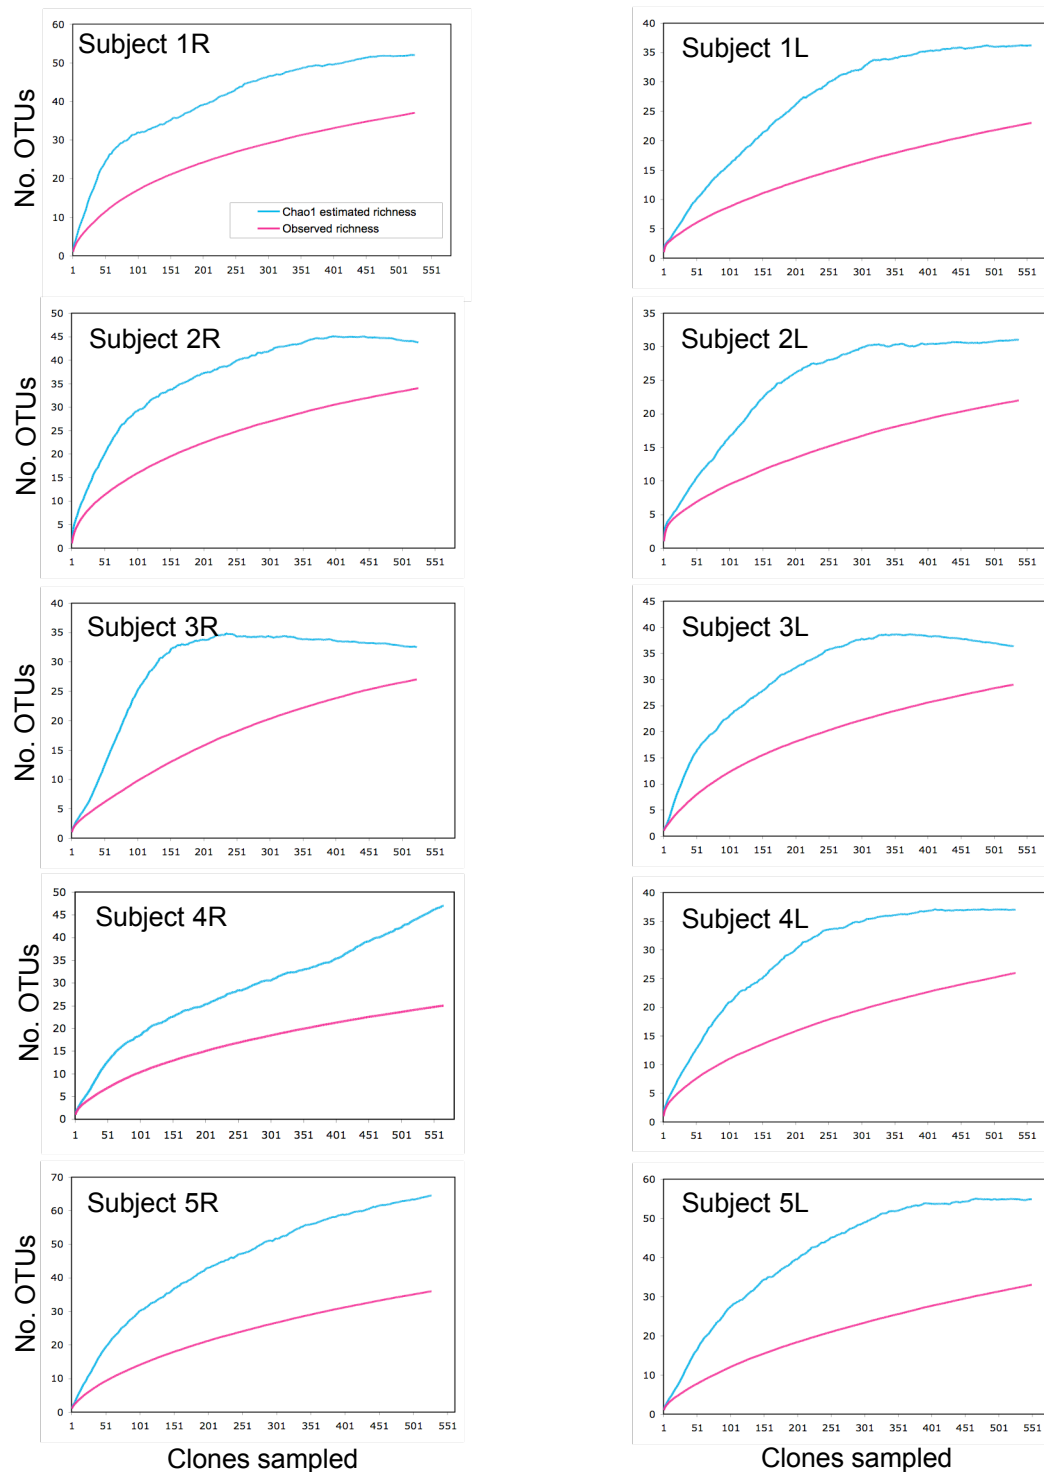

**Figure S3:** Rarefaction curves of observed and estimated (Chao1) OTU richness for each arm of each subject using an OTU threshold of  $\geq 97\%$  identity. As more clones are arbitrarily added, observed and estimated OTUs levels off. The gap between observed and estimated richness indicate that if more clones were sampled, richness would likely continue to increase.
