# Supplementary material for: A diversity profile of the human skin microbiota
Source: HighWire-hosted journal article supplement (doi:10.1101/gr.075549.107), 2008-05-23
Supplement: Grice_TableS4.pdf [file Grice_TableS4.pdf]

**Table S4.** Quality 16s rDNA clones obtained from mouse ear punches.

| Mouse | Sequences |
|-------|-----------|
| 1     | 135       |
| 2     | 172       |
| 3     | 190       |
| 4     | 178       |
