# Supplementary material for: A diversity profile of the human skin microbiota
Source: HighWire-hosted journal article supplement (doi:10.1101/gr.075549.107), 2008-05-23
Supplement: Grice_TableS6.pdf [file Grice_TableS6.pdf]

**Table S6:** Quantitative PCR primers used were 63F:5'GCAGGCCTAACACATGCAAGTC-3' and 355R: 5'-CTGCTGCCTCCCGTAGGAGT-3' (Castillo et al. 2006). The RDP database version 9.59 was searched for hits by these primers. The results reported in the table are filtered for those good quality sequences >1200 bp and allowing for one primer mismatch. Only isolates were included in the search. Total sequences searched is indicated in the last row of the table.

Castillo, M., Martin-Orue, S.M., Manzanilla, E.G., Badiola, I., Martin, M., and Gasa, J. 2006. Quantification of total bacteria, enterobacteria and lactobacilli populations in pig digesta by real-time PCR. *Vet Microbiol* **114**: 165-170.

|           | <b>Proteobacteria</b> | <b>Firmicutes</b> | <b>Bacteroidetes</b> | <b>Actinobacteria</b> | <b>Total</b> |
|-----------|-----------------------|-------------------|----------------------|-----------------------|--------------|
| 63F       | 14349                 | 34                | 1182                 | 11                    | 15622        |
| 355R      | 30821                 | 13768             | 2979                 | 11284                 | 62919        |
| Total RDP | 31157                 | 14012             | 3071                 | 11375                 | 64137        |
