# Supplementary figures and images for: A diversity profile of the human skin microbiota
Source: HighWire-hosted journal article supplement (doi:10.1101/gr.075549.107), 2008-05-23

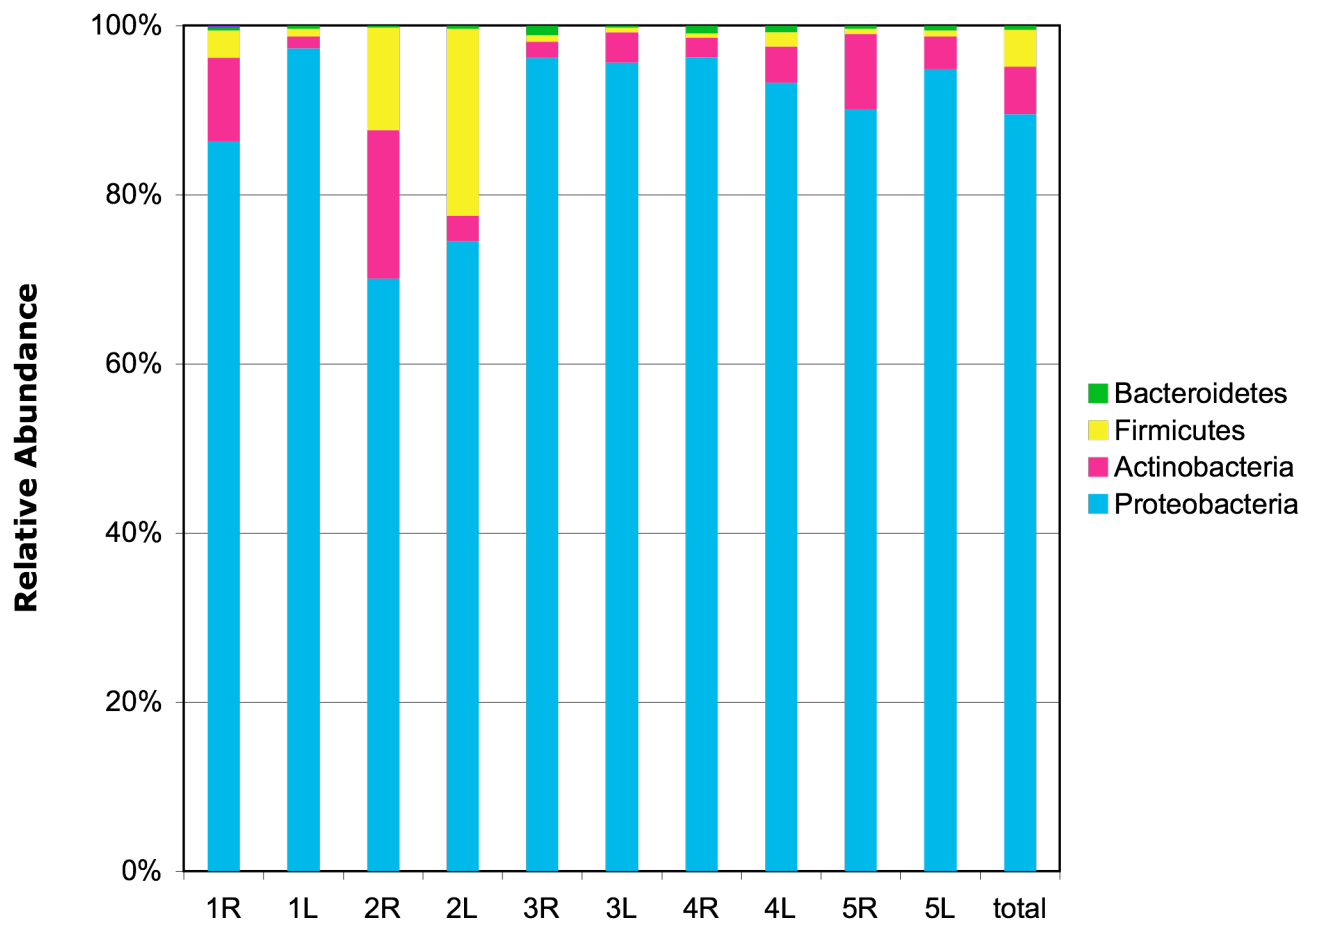

**Figure S2:** Relative abundance of bacterial divisions on each human subject arm.

Supplement: Grice_FigureS2.pdf [file Grice_FigureS2.pdf]
